# Supplementary material for: Using the SARIMA Model to Forecast the Fourth Global Wave of Cumulative Deaths from COVID-19: Evidence from 12 Hard-Hit Big Countries
Source: MDPI journal article supplement (doi:10.3390/econometrics10020018), 2022-04-09
Supplement: s1 [file s1]

## Appendix S1

Figure S1. ACF and PACF plot of the residuals of the SARIMA models obtained using the “auto.arima( )” function.

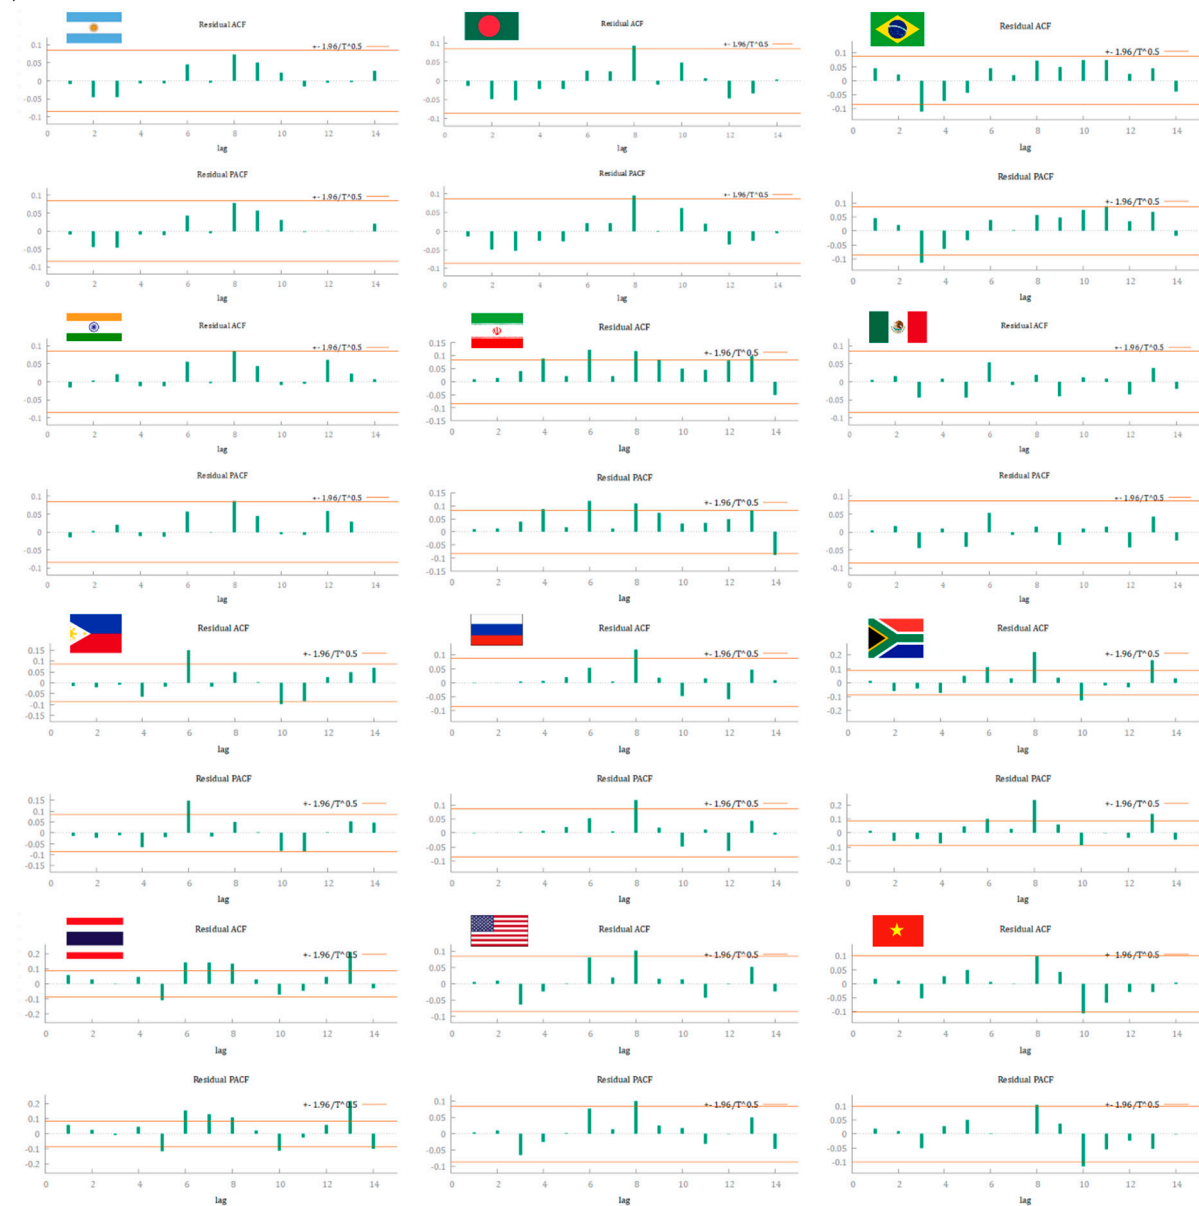

## Appendix S2

Table S2. Comparison between SARIMA models obtained using “auto.arima( )” function and adjusted SARIMA models considering the minimization of AIC, MAE, MAPE, MASE, and RMSE metrics (in percentage), for cumulative deaths from COVID-19.

| Countries    | AIC   | MAE   | MAPE   | MASE  | RMSE  |
|--------------|-------|-------|--------|-------|-------|
| Bangladesh   | -0.97 | -1.78 | -31.37 | -1.54 | -1.56 |
| Brazil       | -0.29 | -5.62 | -2.87  | -3.67 | -3.56 |
| Iran         | -0.75 | -5.36 | -11.65 | -3.94 | -4.84 |
| Philippines  | -0.55 | -5.87 | -4.59  | -5.75 | -6.52 |
| Russia       | -0.97 | -6.38 | -2.4   | -4.82 | -6.53 |
| South Africa | -0.85 | -8.67 | -6.41  | -8.8  | -9.3  |

|          |        |        |       |       |       |
|----------|--------|--------|-------|-------|-------|
| Thailand | -5.48  | -11.19 | 6.22  | -10   | -22.1 |
| US       | -0.019 | -0.55  | 0.44  | -0.48 | -0.91 |
| Vietnam  | -0.3   | 5.55   | 25.88 | 5.51  | -4.96 |

Notes: negative (positive) values show the percentage efficiency gain (loss) from using adjusted SARIMA models. Roman values indicate that adjusted SARIMA models were better, while italic values indicate that non-adjusted SARIMA models were better.

### Appendix S3

Table S3 (part 1). The parameters values of the best SARIMA models (reported in Table 5).

| Parameters   | AR         | BD         | BR         | IN         | IR         | MX        |
|--------------|------------|------------|------------|------------|------------|-----------|
| Non-seasonal |            |            |            |            |            |           |
| AR (1)       |            | 1.0583***  | 0.9396***  |            | 1.2383***  |           |
| AR (2)       |            | 0.8246***  |            |            | -0.3184*** |           |
| AR (3)       |            | -0.8857*** |            |            | -0.0278    |           |
| AR (4)       |            |            |            |            | 0.1144*    |           |
| AR (5)       |            |            |            |            | -0.1759**  |           |
| AR (6)       |            |            |            |            | 0.0991*    |           |
| MA (1)       | -0.8866*** | -0.4914*** | -0.7107*** | -0.6003*** | -1.6674*** | -0.904*** |
| MA (2)       |            | -0.7714*** | -0.1091*** |            | 0.7645***  |           |
| MA (3)       |            | 0.3363***  | -0.0365    |            |            |           |
| MA (4)       |            |            | 0.0516     |            |            |           |
| MA (5)       |            |            | -0.018     |            |            |           |
| MA (6)       |            |            | 0.0979**   |            |            |           |
| MA (7)       |            |            | 0.6578***  |            |            |           |
| MA (8)       |            |            | 0.0726     |            |            |           |
| Seasonal     |            |            |            |            |            |           |
| AR (1)       | -0.0719*   | 0.4869***  |            | 0.9088***  | 1.0986***  | 0.1774*** |
| AR (2)       | 0.9281***  |            |            | -0.7565*** | -0.1082*   | 0.1578*** |
| AR (3)       |            |            |            |            |            | 0.1409*** |
| AR (4)       |            |            |            |            |            | 0.1153*** |
| MA (1)       | 0.1926*    | -1.262***  | 0.0726     | -0.9502*** | -0.92***   |           |
| MA (2)       | -0.8067*** | 0.2865*    |            | 0.8578***  |            |           |
| MA (3)       |            |            |            |            |            |           |

Notes: p-value < 0.01\*\*\*; p-value < 0.05\*\*; p-value < 0.1\*. Standards errors (omitted) are based on Hessian. Countries: AR, Argentina; BD, Bangladesh; BR, Brazil; IN, India; IR, Iran; MX, Mexico.

Table S3 (part 2). The parameters values of the best SARIMA models (reported in Table 5).

| Parameters   | PH         | RU         | ZA       | TH         | US        | VN         |
|--------------|------------|------------|----------|------------|-----------|------------|
| Non-seasonal |            |            |          |            |           |            |
| AR (1)       | -0.8236*** | -0.7755*** | 0.2257   | -0.2266    | 0.8642*** | -0.1419    |
| AR (2)       | -0.7853*** | 0.3712*    | -0.0556  | -0.5081*** | -0.0726   | -0.1515    |
| AR (3)       | -0.729***  | 0.5178***  | 0.2403** | -0.3056*   | -0.032    | 0.0985     |
| AR (4)       | -0.8714*** | -0.1754*   | 0.1722   | 0.4661***  | 0.0557    | -0.4484*** |
| AR (5)       | -0.7406*** |            | 0.298*** |            | 0.0357    | -0.0344    |
| AR (6)       | -0.5495*** |            |          |            | 0.1044*   |            |
| MA (1)       | 0.1161     | 0.307**    | 0.0128   | -0.3659**  | -0.3182*  | -0.8437*** |
| MA (2)       | 0.125      | -0.8756*** | 0.1646   | 0.2527**   |           | 0.0722     |
| MA (3)       | 0.1225     | -0.3928*** | -0.0828  | 0.0021     |           | -0.1746    |
| MA (4)       | 0.1502     | 0.5962***  | -0.1015  | -0.3736*** |           | 0.5919***  |

|          |            |          |            |            |            |        |
|----------|------------|----------|------------|------------|------------|--------|
| MA (5)   |            |          | -0.1896**  | 0.0742     |            |        |
| MA (6)   |            |          | 0.1372**   | 0.4612***  |            |        |
| MA (7)   |            |          | -0.3864*** | -0.4587*** |            |        |
| MA (8)   |            |          | 0.2525**   | 0.269**    |            |        |
| MA (9)   |            |          |            | 0.0352     |            |        |
| MA (10)  |            |          |            | -0.2722*** |            |        |
| <hr/>    |            |          |            |            |            |        |
| Seasonal |            |          |            |            |            |        |
| AR (1)   | -0.4188*** | -0.0935  | 0.3914*    | 0.4756***  |            |        |
| AR (2)   | 0.4632***  | 0.5145*  | -0.6573*** | -0.3031*** |            |        |
| AR (3)   | 0.8958***  | 0.4692   | 0.5667***  | 0.6774***  |            |        |
| AR (4)   |            | 0.0387   | 0.1617     | -0.1978**  |            |        |
| MA (1)   | 0.0527     | 0.3415   | -0.7604*** | -0.0292    | -0.6052*** | 0.0452 |
| MA (2)   | -0.6341*** | -0.2529  | 0.783***   | 0.6909***  |            |        |
| MA (3)   | -0.7613*** | -0.4179* | -0.9761*** |            |            |        |
| MA (4)   | 0.4458***  |          | -0.0088    |            |            |        |

Notes: p-value < 0.01\*\*\*; p-value < 0.05\*\*; p-value < 0.1\*. Standards errors (omitted) are based on Hessian.  
Countries: PH, the Philippines; RU, Russia; ZA, South Africa; TH, Thailand; US, the United States; VN, Vietnam.
